# Supplementary material for: COPD-Lower Respiratory Tract Infection Visual Analogue Score (c-LRTI-VAS) validation in stable and exacerbated patients with COPD
Source: HighWire-hosted journal article supplement (doi:10.1136/bmjresp-2020-000761), 2021-02-01
Supplement: bmjresp-2020-000761supp001_data_supplement.pdf [file bmjresp-2020-000761supp001_data_supplement.pdf]

## Figure 1 supplementary information

**COPD-Lower Respiratory Tract Infection Visual Analogue Score (c-LRTI-VAS)**

Name/ date of birth:

**THIS QUESTIONNAIRE DEALS WITH THE COMPLAINTS YOU EXPERIENCED DURING THE LAST DAYS. PLEASE PUT A CROSS AT THE FOLLOWING LINES.**

## 1. Shortness of breath

I have no Shortness of breath at all |-----| I have the worst thinkable Shortness of breath

## 2. TIREDNESS

I am not tired at all |-----| I have the worst thinkable tiredness

## 3. COUGH

I do not cough at all |-----| I have the worst thinkable cough

## 4. COLOUR OF SPUTUM?

White sputum/no sputum |-----| Dark green sputum

Copyright (C) Wim G Boersma, All rights reserved.

| Table 1 c-LRTI-VAS, CCQ and SGRQ score at inclusion in stable state and during AECOPD |                 |                                |                 |
|---------------------------------------------------------------------------------------|-----------------|--------------------------------|-----------------|
| c-LRTI-VAS stable t=0                                                                 |                 | c-LRTI-VAS AECOPD t=0          |                 |
| Shortness of breath (median, IQR)                                                     | 4(2-6)          | Dyspnea (median, IQR)          | 7(6-9)          |
| Tiredness (median, IQR)                                                               | 3(1-6)          | Tiredness (median, IQR)        | 8(5-9)          |
| Cough (median, IQR)                                                                   | 2(1-4)          | Cough (median, IQR)            | 6(5-8)          |
| Sputum purulence (median, IQR)                                                        | 1(0-2)          | Sputum purulence (median, IQR) | 2(0-5)          |
| Total score (median, IQR)                                                             | 11(7-16)        | Total score (mean, SD)         | 23.2(6.2)       |
| CCQ stable t=0                                                                        |                 | CCQ AECOPD t=0                 |                 |
| Symptoms (median, IQR)                                                                | 2.25(1.50-2.75) | Symptoms (median, IQR)         | 3.88(3.00-4.50) |
| Mental (median, IQR)                                                                  | 0.50(0.00-1.50) | Mental (median, IQR)           | 2.50(1.38-3.50) |
| Functional (median, IQR)                                                              | 1.50(0.75-2.50) | Functional (median, IQR)       | 4.00(3.19-4.75) |
| Total score (median, IQR)                                                             | 1.70(1.20-2.30) | Total score (median, IQR)      | 3.70(3.18-4.1)  |
| SGRQ stable t=0                                                                       |                 | SGRQ AECOPD t=0                |                 |
| Symptoms (mean, SD)                                                                   | 44.1(21.2)      | Symptoms (mean, SD)            | 63.5(17.1)      |
| Activity (median, IQR)                                                                | 66.1(47.5-73.8) | Activity (median, IQR)         | 86.3(73.1-92.5) |
| Impact (mean, SD)                                                                     | 26.6(17.7)      | Impact (mean, SD)              | 55.4(18.0)      |
| Total (mean, SD)                                                                      | 39.5(17.0)      | Total (mean, SD)               | 64.9(13.8)      |
